# Supplementary material
Source: publisher figshare collection journal article supplement (https://brill.figshare.com/ndownloader/files/31178326)
Supplement: Supplementary file 1 [file 31178326]

**Supplement 1.** Topin-app results and validation status of submitted observations sorted by family of correct species (* referring to the correct family).

| Family* | Top result | Confidence [%] | Corrected ID | Correct ID suggested [%] | Submission date | Validation date |
| --- | --- | --- | --- | --- | --- | --- |
| Byrrhidae | *Byrrhus pilula* | 86 | *Byrrhus* spec. | − | 13.vi.2021 | − |
| Byturidae | *Byturus tomentosus* | 90 | *Byturus ochraceus* | − | 14.v.2021 | − |
| Cantharidae | *Cantharis nigricans* | 96 | + | + | 30.vi.2021 | 30.vi.2021 |
| Cantharidae | *Oberea oculata* | 100 | *Cantharis pellucida* | − | 30.vi.2021 | − |
| Carabidae | *Carabus auratus* | 99 | + | + | 15.v.2021 | 15.vi.2021 |
| Carabidae | *Carabus violaceus* | 87 | + | + | 13.vi.2021 | 14.vi.2021 |
| Carabidae | *Nebria* spec. | 41 | + | + | 15.v.2021 | 18.v.2021 |
| Cerambycidae | *Agapanthia villosoviridescens* | 100 | + | + | 15.vi.2021 | 16.vi.2021 |
| Cerambycidae | *Alosterna tabacicolor* | 100 | + | + | 13.vi.2021 | − |
| Cerambycidae | *Alosterna tabacicolor* | 100 | + | + | 15.vi.2021 | 16.vi.2021 |
| Cerambycidae | *Aromia moschata* | 100 | *Cerambyx cerdo* | − | 14.vi.2021 | 16.vi.2021 |
| Cerambycidae | *Clytus arietis* | 100 | + | + | 15.vi.2021 | 16.vi.2021 |
| Cerambycidae | *Calosoma inquisitor* | 93 | *Cortodera humeralis* | − | 15.v.2021 | − |
| Cerambycidae | *Grammoptera ruficornis* | 100 | + | + | 15.vi.2021 | − |
| Cerambycidae | *Alosterna tabacicolor* | 98 | *Grammoptera ustulata* | − | 14.v.2021 | 18.v.2021 |
| Cerambycidae | *Pachytodes cerambyciformis* | 100 | + | + | 15.vi.2021 | 16.vi.2021 |
| Cerambycidae | *Phymatodes testaceus* | 100 | + | + | 12.vi.2021 | 14.vi.2021 |
| Cerambycidae | *Rhagium sycophanta* | 80 | + | + | 12.vi.2021 | 14.vi.2021 |
| Cerambycidae | *Spondylis buprestoides* | 100 | + | + | 14.vi.2021 | − |
| Cerambycidae | *Rhagonycha testacea* | 21 | *Tetrops praeustus* | − | 30.vi.2021 | − |
| Chrysomelidae | *Cassida rubiginosa* | 100 | + | + | 30.vi.2021 | − |
| Chrysomelidae | *Chrysolina fastuosa* | 100 | + | + | 13.vi.2021 | − |
| Chrysomelidae | *Chrysolina oricalcia* | 100 | + | + | 15.vi.2021 | 19.vi.2021 |
| Chrysomelidae | *Chrysolina sanguinolenta* | 30 | + | + | 13.vi.2021 | − |
| Chrysomelidae | *Gastrophysa viridula* | 100 | + | + | 14.v.2021 | 15.v.2021 |
| Chrysomelidae | *Gastrophysa viridula* | 100 | + | + | 15.vi.2021 | 16.vi.2021 |
| Chrysomelidae | *Gastrophysa polygoni* | 62 | *Oulema duftschmidi/melanopus* | 8 | 14.v.2021 | − |
| Cleridae | *Thanasimus formicarius* | 100 | + | + | 12.vi.2021 | 14.vi.2021 |
| Cleridae | *Trichodes alvearius* | 100 | + | + | 15.v.2021 | − |
| Coccinellidae | *Coccinula quatuordecimpustulata* | 99 | + | + | 15.vi.2021 | 16.vi.2021 |
| Coccinellidae | *Harmonia axyridis* | 100 | + | + | 14.vi.2021 | 14.vi.2021 |
| Coccinellidae | *Psyllobora vigintiduopunctata* | 100 | + | + | 12.vi.2021 | 16.vi.2021 |
| Curculionidae | *Hylobius abietis* | 100 | + | + | 13.vi.2021 | − |
| Curculionidae | *Larinus turbinatus* | 81 | *Lepyrus capucinus* | − | 15.v.2021 | − |
| Curculionidae | *Philopedon plagiatus* | 92 | + | + | 14.v.2021 | − |
| Curculionidae | *Phyllobius argentatus* | 94 | + | + | 15.v.2021 | − |
| Curculionidae | *Phyllobius pomaceus* | 100 | + | + | 12.vi.2021 | − |
| Curculionidae | *Phyllobius pomaceus* | 100 | + | + | 30.vi.2021 | − |
| Curculionidae | *Liparus germanus* | 55 | *Sphenophorus striatopunctatus* | − | 13.vi.2021 | − |
| Curculionidae | *Strophosoma melanogrammum* | 71 | *Strophosoma capitatum* | 29 | 14.v.2021 | − |
| Curculionidae | *Otiorhynchus porcatus* | 63 | *Trachodes hispidus* | − | 14.v.2021 | 18.v.2021 |
| Dermestidae | *Anthrenus pimpinellae* | 33 | *Anthrenus scrophulariae* | − | 15.v.2021 | 14.vi.2021 |
| Dermestidae | *Dermestes undulatus* | 50 | *Dermestes lanarius* | − | 13.vi.2021 | − |
| Dytiscidae | *Graphoderus cinereus* | 97 | + | + | 14.v.2021 | − |
| Dytiscidae | *Hydaticus seminiger* | 100 | + | + | 14.v.2021 | − |
| Dytiscidae | *Hydroporus palustris* | 100 | *Suphrodytes figuratus* | − | 14.v.2021 | − |
| Elateridae | *Hemicrepidius* spec. | 42 | *Dicronychus cinereus* | − | 14.v.2021 | − |
| Elateridae | *Athous haemorrhoidalis* | 45 | *Hemicrepidius niger* | − | 14.v.2021 | − |
| Elateridae | *Agrypnus murina* | 87 | *Lacon querceus* | − | 12.vi.2021 | − |
| Geotrupidae | *Geotrupes stercorosus* | 97 | + | + | 15.vi.2021 | 16.vi.2021 |
| Geotrupidae | *Geotrupes vernalis* | 100 | + | + | 15.v.2021 | − |
| Geotrupidae | *Geotrupes vernalis* | 100 | + | + | 15.vi.2021 | 16.vi.2021 |
| Geotrupidae | *Typhaeus typhoeus* | 100 | + | + | 14.v.2021 | 14.v.2021 |
| Lucanidae | *Dorcus parallelipipedus* | 100 | + | + | 12.vi.2021 | 16.vi.2021 |
| Lucanidae | *Eriocheir sinensis* | 39 | *Lucanus cervus* | − | 14.vi.2021 | 16.vi.2021 |
| Lucanidae | *Raja montagui* | 81 | *Lucanus cervus* | − | 14.vi.2021 | 16.vi.2021 |
| Lycidae | *Pyrochroa coccinea* | 100 | *Lygistopterus sanguineus* | 0 | 13.vi.2021 | − |
| Melandryidae | *Oulema obscura* | 22 | *Melandrya caraboides* | 8 | 12.vi.2021 | 14.vi.2021 |
| Melyridae | *Anthocomus fasciatus* | 100 | + | 0 | 14.v.2021 | − |
| Oedemeridae | *Oedemera virsescens* | 93 | + | + | 14.v.2021 | − |
| Ptinidae | *Hedobia imperialis* | 17 | *Ptinus sexpunctatus* | − | 13.vi.2021 | 14.vi.2021 |
| Pyrochroidae | *Pyrochroa coccinea* | 100 | + | + | 14.v.2021 | 14.v.2021 |
| Pyrochroidae | *Pyrochroa serraticornis* | 100 | + | + | 14.v.2021 | 14.v.2021 |
| Scarabaeidae | *Anomala dubia* | 60 | + | + | 13.vi.2021 | − |
| Scarabaeidae | *Cetonia aurata* | 100 | + | + | 14.vi.2021 | 14.vi.2021 |
| Scarabaeidae | *Phyllopertha horticola* | 100 | *Chaetopteroplia segetum* | − | 30.vi.2021 | 30.vi.2021 |
| Scarabaeidae | *Melolontha melolontha* | 100 | + | + | 15.vi.2021 | 16.vi.2021 |
| Scarabaeidae | *Geotrupes stercorosus* | 21 | *Onthophagus* spec. | 10 | 15.v.2021 | 18.v.2021 |
| Scarabaeidae | *Oryctes nasicornis* | 100 | + | + | 15.v.2021 | 15.v.2021 |
| Scarabaeidae | *Oxythyrea funesta* | 100 | + | + | 13.vi.2021 | − |
| Scarabaeidae | *Phyllopertha horticola* | 100 | + | + | 15.vi.2021 | 19.vi.2021 |
| Scarabaeidae | *Cetonia aurata* | 74 | *Protaetia speciosissima* | − | 12.vi.2021 | 16.vi.2021 |
| Silphidae | *Phosphuga atrata* | 87 | *Silpha tristis* | 12 | 13.vi.2021 | − |
| Staphylinidae | *Ocypus olens* | 100 | + | + | 30.vi.2021 | 30.vi.2021 |
| Tenebrionidae | *Nalassus laevioctostriatus* | 98 | + | + | 13.vi.2021 | 14.vi.2021 |
|  | |  |  |  |  |  |
| Color code | Correct species | 90–100% [correct] | Software result accepted | Top result is correct [>50%] | Validation in progress | |
|  | Presumed correct species | 75–89% [correct] | Software result corrected (ID certain) | With 25–50% confidence | Validation within ~ 7 days | |
|  | Correct genus | 50–74% [correct] | Software result corrected (ID uncertain) | With <25% confidence | Validation within ~ 1 month | |
|  | Correct family | <50% |  | Correct result not suggested | Validation pending | |
|  | Correct order | 50–74% [incorrect] |  |  |  |  |
|  | Error at higher taxonomic level | 75–89% [incorrect] |  |  |  |  |
|  |  | 90–100% [incorrect] |  |  |  |  |
